# Supplementary material for: Precise Control of the Number of Layers of Graphene by Picosecond Laser Thinning
Source: PubMed Central journal article supplement (PMC4481519; doi:10.1038/srep11662), 2015-06-26
Supplement: srep11662-s1.pdf [file srep11662-s1.pdf]

Supplementary Information

**Precise Control of the Number of Layers of Graphene by Picosecond Laser Thinning**

Zhe Lin<sup>1</sup>, Xiaohui Ye<sup>1</sup>, Jinpeng Han<sup>1</sup>, Qiao Chen<sup>1,2</sup>, Peixun Fan<sup>1</sup>, Hongjun Zhang<sup>1</sup>, Dan Xie<sup>3</sup>,  
Hongwei Zhu<sup>1,2\*</sup>, Minlin Zhong<sup>1\*</sup>

<sup>1</sup>School of Materials Science and Engineering, Tsinghua University, Beijing 100084, China

<sup>2</sup>State Key Laboratory of New Ceramics and Fine Processing, Tsinghua University, Beijing  
100084, China

<sup>3</sup>Tsinghua National Laboratory for Information Science and Technology (TNList), Institute of  
Microelectronics, Tsinghua University, Beijing 100084, China

\*Emails: zhml@tsinghua.edu.cn, hongweizhu@tsinghua.edu.cn

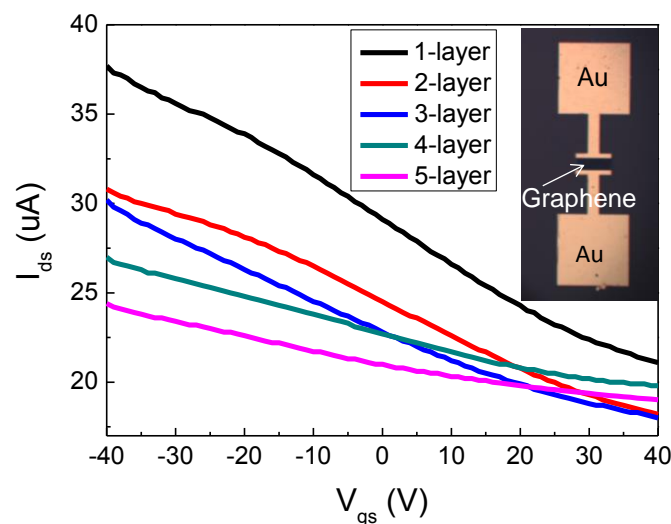

**Figure S1.** Source-drain current vs. gate voltage plots from graphene FETs of different number of layers. The channel length is 30  $\mu\text{m}$ . The inset shows the optical image of a FET device.
